# CALL FOR APPLICATIONS TO THE 2016 RESEARCH COLLOQUIUM FOR JUNIOR INVESTIGATORS

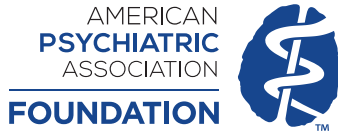

**SUNDAY,  
MAY 15, 2016  
8:00a.m.-5:00p.m.  
Omni Atlanta Hotel  
At CNN Center**

**Questions?  
colloquium@psych.org**

## ATTENTION PSYCHIATRIC RESIDENTS, FELLOWS, JUNIOR FACULTY

The Research Colloquium is accepting applications for the 2016 meeting in Atlanta, Georgia, held in conjunction with the annual meeting of the American Psychiatric Association. MDs who are senior residents, fellows, or junior faculty in psychiatry are eligible to apply.

Successful applicants will receive \$1,000 travel stipends to discuss their research in a small group setting with distinguished senior leaders in psychiatric research.

The Colloquium provides a one-day, immersive, research experience for junior investigators in the early phases of their training in psychiatry. It represents an important opportunity for mentorship, guidance, information on research career development and grantsmanship, and networking.

**Deadline: December 15, 2015**

Pre-application technical assistance is available.

Eligibility details and application packet: <http://psychiatry.org/psychiatrists/practice/research/research-colloquium>

## FREE Online Subscription to *Psychiatric Services* for APA Resident-Fellow Members (RFMs)!

American Psychiatric Association Resident-Fellow Members (RFMs) can receive a free online subscription to *Psychiatric Services*.

Simply visit [ps.psychiatryonline.org](http://ps.psychiatryonline.org) for full-text access to all of the content of APA's highly ranked, peer-reviewed monthly journal. *Psychiatric Services* focuses on service delivery in organized systems of care, evolving best practices, and federal and state policies that affect the care of people with mental illnesses.

Please visit [ps.psychiatryonline.org](http://ps.psychiatryonline.org) and log in with your American Psychiatric Association username and password.

Psychiatry residents who are not currently APA Resident-Fellow Members should consider membership in the American Psychiatric Association. The benefits provided to residents are an example of how the APA serves the needs of its members throughout their careers. The low introductory dues APA extends to RFMs are even waived for the first year. Please visit [www.psychiatry.org/joinapa](http://www.psychiatry.org/joinapa) for more information.

[ps.psychiatryonline.org](http://ps.psychiatryonline.org)

AMERICAN  
PSYCHIATRIC  
ASSOCIATION  
PUBLISHING

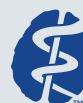

[www.appi.org](http://www.appi.org)  
Email: [appi@psych.org](mailto:appi@psych.org)  
Toll-Free: 1-800-368-5777

AH1507A

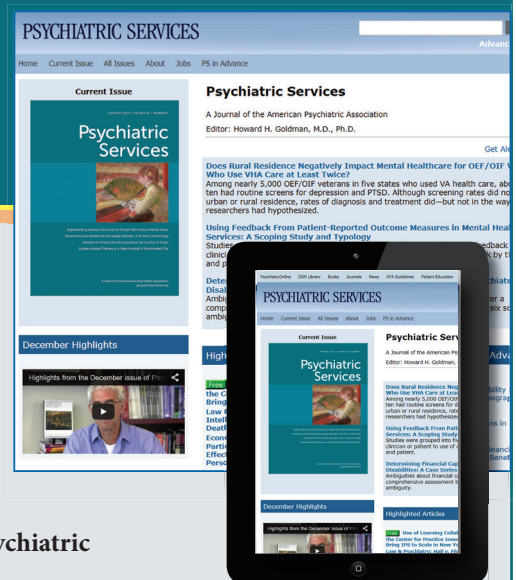

Source: https://ps.psychiatryonline.org/doi/suppl/10.1176/ps.2015.66.issue-12/suppl_file/front.pdf
