# Understanding Mental Disorders

## Your Guide to DSM-5®

American Psychiatric Association

A consumer guide for anyone who has  
been touched by mental illness!

With Foreword by Patrick J. Kennedy

Most of us know someone who suffers from a mental illness. This book helps those who may be struggling with mental health problems, as well as those who want to help others achieve mental health and well-being.

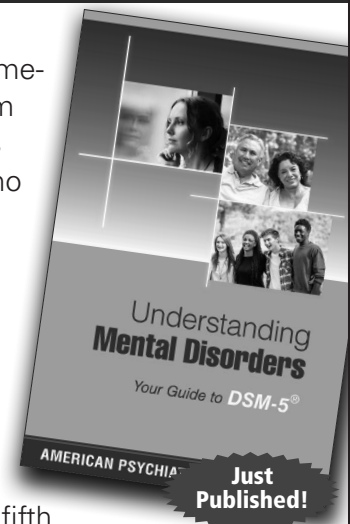

Based on the latest, fifth edition of the *Diagnostic and Statistical Manual of Mental Disorders*—known as DSM-5®—**Understanding Mental Disorders** provides valuable insight on what to expect from an illness and its treatment—and will help readers recognize symptoms, know when to seek help, and get the right care. Featured disorders include depression, schizophrenia, ADHD, autism spectrum disorder, posttraumatic stress disorder, and bipolar disorder, among others.

2015 • 388 pages • ISBN 978-1-58562-491-1  
Paperback • \$24.95 • Item #62491

AMERICAN  
PSYCHIATRIC  
ASSOCIATION  
PUBLISHING

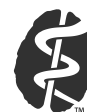

[www.appi.org](http://www.appi.org)

Phone: 703-907-7322

Toll Free: 1-800-368-5777

Email: [appi@psych.org](mailto:appi@psych.org)

20% Discount • American Psychiatric Association Members  
25% Discount • APA Resident-Fellow Members

AH1512\_HJH

### PS Form 3526 Statement of Ownership, Management, and Circulation (All Periodicals Publications Except Requester Publications)

|                                                                                                                                                                                                                                                                                                                                                                                                                                                                                                                                                                         |  |                                                       |                  |                                                               |
|-------------------------------------------------------------------------------------------------------------------------------------------------------------------------------------------------------------------------------------------------------------------------------------------------------------------------------------------------------------------------------------------------------------------------------------------------------------------------------------------------------------------------------------------------------------------------|--|-------------------------------------------------------|------------------|---------------------------------------------------------------|
| 1. Publication Title<br>PSYCHIATRIC SERVICES/AMERICAN PSYCHIATRIC ASSOCIATION                                                                                                                                                                                                                                                                                                                                                                                                                                                                                           |  | 2. Publication Number<br>251260                       | ISSN<br>10752730 | 3. Filing Date<br>09/28/2015                                  |
| 4. Issue Frequency<br>MONTHLY                                                                                                                                                                                                                                                                                                                                                                                                                                                                                                                                           |  | 5. Number of Issues Published Annually<br>12          |                  | 6. Annual Subscription Price<br>\$ 143.00                     |
| 7. Complete Mailing Address of Known Office of Publication<br>1000 WILSON BLVD STE 1825<br>ARLINGTON, ARLINGTON, VA 22209-3924                                                                                                                                                                                                                                                                                                                                                                                                                                          |  |                                                       |                  | Contact Person<br>ROGER DOMRAS<br>Telephone<br>(703) 907-8544 |
| 8. Complete Mailing Address of Headquarters or General Business Office of Publisher<br>1000 Wilson Blvd., Ste 1825<br>Arlington, VA 22209-3924                                                                                                                                                                                                                                                                                                                                                                                                                          |  |                                                       |                  |                                                               |
| 9. Full Names and Complete Mailing Addresses of Publisher, Editor, and Managing Editor                                                                                                                                                                                                                                                                                                                                                                                                                                                                                  |  |                                                       |                  |                                                               |
| Publisher (Name and complete mailing address)<br>Rebecca Renhart<br>1000 Wilson Blvd., Ste 1825<br>Arlington, VA 22209-3924                                                                                                                                                                                                                                                                                                                                                                                                                                             |  |                                                       |                  |                                                               |
| Editor (Name and complete mailing address)<br>Howard H. Goldman, M.D. PhD<br>1000 Wilson Blvd., Ste 1825<br>Arlington, VA 22209-3924                                                                                                                                                                                                                                                                                                                                                                                                                                    |  |                                                       |                  |                                                               |
| Managing Editor (Name and complete mailing address)<br>Constance Grant Gartner<br>1000 Wilson Blvd., Ste. 1825<br>Arlington, VA 22209-3924                                                                                                                                                                                                                                                                                                                                                                                                                              |  |                                                       |                  |                                                               |
| 10. Owner (Do not leave blank. If the publication is owned by a corporation, give the name and address of the corporation immediately followed by the names and addresses of all stockholders owning or holding 1 percent or more of the total amount of stock. If not owned by a corporation, give names and addresses of the individual owners. If owned by a partnership or other unincorporated firm, give its name and address as well as those of each individual owner. If the publication is published by a nonprofit organization, give its name and address.) |  |                                                       |                  |                                                               |
| Full Name                                                                                                                                                                                                                                                                                                                                                                                                                                                                                                                                                               |  | Complete Mailing Address                              |                  |                                                               |
| American Psychiatric Assoc.                                                                                                                                                                                                                                                                                                                                                                                                                                                                                                                                             |  | 1000 Wilson Blvd., Ste 1825, Arlington, VA 22209-3924 |                  |                                                               |
| 11. Known Bondholders, Mortgagees, and Other Security Holders Owning or Holding 1 Percent or More of Total Amount of Bonds, Mortgages, or Other Securities. If none, check box <input checked="" type="checkbox"/> None                                                                                                                                                                                                                                                                                                                                                 |  |                                                       |                  |                                                               |
| Full Name                                                                                                                                                                                                                                                                                                                                                                                                                                                                                                                                                               |  | Complete Mailing Address                              |                  |                                                               |

PS Form 3526, September 2007 (Page 1)

PRIVACY NOTICE: See our privacy policy on [www.usps.com](http://www.usps.com)

|                                                                                                                                 |                                                                                                                                                                    |                                                          |                                                             |
|---------------------------------------------------------------------------------------------------------------------------------|--------------------------------------------------------------------------------------------------------------------------------------------------------------------|----------------------------------------------------------|-------------------------------------------------------------|
| 13. Publication Title<br>PSYCHIATRIC SERVICES/AMERICAN PSYCHIATRIC ASSOCIATION                                                  |                                                                                                                                                                    | 14. Issue Date for Circulation Data Below<br>09/01/2015  |                                                             |
| 15. Extend and Nature of Circulation                                                                                            |                                                                                                                                                                    | Average No. Copies Each Issue During Preceding 12 Months | No. Copies of Single Issue Published Nearest to Filing Date |
| a. Total Numbers of Copies (Net press run)                                                                                      |                                                                                                                                                                    | 1386                                                     | 918                                                         |
| b. Paid Circulation (By Mail and Outside the Mail)                                                                              | (1) Mailed Outside County Paid Subscriptions Stated on PS Form 3541 (include paid distribution above nominal rate, advertiser's proof copies, and exchange copies) | 623                                                      | 608                                                         |
|                                                                                                                                 | (2) Mailed In-County Paid Subscriptions Stated on PS Form 3541 (include paid distribution above nominal rate, advertiser's proof copies, and exchange copies)      | 0                                                        | 0                                                           |
|                                                                                                                                 | (3) Paid Distribution Outside the Mails Including Sales Through Dealers and Carriers, Street Vendors, Counter Sales, and Other Paid Distribution Outside USPS      | 89                                                       | 83                                                          |
|                                                                                                                                 | (4) Paid Distribution by Other Classes of Mail Through the USPS (e.g. First-Class Mail)                                                                            | 0                                                        | 0                                                           |
| c. Total Paid Distribution (Sum of 15b (1), (2), (3), (4))                                                                      |                                                                                                                                                                    | 712                                                      | 691                                                         |
| d. Free or Nominal Rate Distribution (By Mail and Outside the Mail)                                                             | (1) Free or Nominal Rate Outside County Copies included on PS Form 3541                                                                                            | 0                                                        | 0                                                           |
|                                                                                                                                 | (2) Free or Nominal Rate In-County Copies included on PS Form 3541                                                                                                 | 0                                                        | 0                                                           |
|                                                                                                                                 | (3) Free or Nominal Rate Copies Mailed at Other Classes Through the USPS (e.g. First-Class Mail)                                                                   | 0                                                        | 0                                                           |
|                                                                                                                                 | (4) Free or Nominal Rate Distribution Outside the Mail (Carriers or other means)                                                                                   | 100                                                      | 78                                                          |
| e. Total Free or Nominal Rate Distribution (Sum of 15d (1), (2), (3), (4))                                                      |                                                                                                                                                                    | 100                                                      | 78                                                          |
| f. Total Distribution (Sum of 15c and 15e)                                                                                      |                                                                                                                                                                    | 812                                                      | 769                                                         |
| g. Copies not Distributed                                                                                                       |                                                                                                                                                                    | 574                                                      | 149                                                         |
| h. Total (Sum of 15f and 15g)                                                                                                   |                                                                                                                                                                    | 1386                                                     | 918                                                         |
| i. Percent Paid ((15c / 15f) times 100)                                                                                         |                                                                                                                                                                    | 87.68 %                                                  | 89.86 %                                                     |
| 16. If total circulation includes electronic copies, report that circulation on lines below.                                    |                                                                                                                                                                    |                                                          |                                                             |
| a. Paid Electronic Copies                                                                                                       |                                                                                                                                                                    | 0                                                        | 0                                                           |
| b. Total Paid Print Copies (Line 15c) + Paid Electronic Copies                                                                  |                                                                                                                                                                    | 0                                                        | 0                                                           |
| c. Total Print Distribution (Line 15f) + Paid Electronic Copies                                                                 |                                                                                                                                                                    | 0                                                        | 0                                                           |
| d. Percent Paid (Both Print and Electronic Copies)                                                                              |                                                                                                                                                                    | 0.00 %                                                   | 0.00 %                                                      |
| <input type="checkbox"/> I certify that 50% of all my distributed copies (Electronic and Print) are paid above a nominal price. |                                                                                                                                                                    |                                                          |                                                             |

17. Publication of Statement of Ownership

If the publication is a general publication, publication of this statement is required. Will be printed in the 11/01/2015 issue of this publication.  Publication not required.

|                                                                          |                                    |                        |
|--------------------------------------------------------------------------|------------------------------------|------------------------|
| 18. Signature and Title of Editor, Publisher, Business Manager, or Owner | Title                              | Date                   |
| Peter Van Woerden                                                        | Dir. Finance Publishing Operations | 09/25/2015 00:00:00 AM |

I certify that all information furnished on this form is true and complete. I understand that anyone who furnishes false or misleading information on this form or who omits material or information requested on the form may be subject to criminal sanctions (including fines and imprisonment) and/or civil sanctions (including civil penalties).

PS Form 3526, September 2007 (Page 2)

PRIVACY NOTICE: See our privacy policy on [www.usps.com](http://www.usps.com)

# Unmatched Growth Opportunities

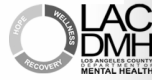

"The leaders [at DMH] are visionary and ahead of the curve...particularly when it comes to healthcare reform."

*Christopher Thompson, MD  
Supervising Psychiatrist*

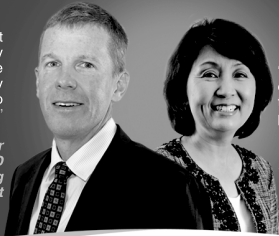

"The Department has a lot of innovative approaches to treating a very difficult population."

*Karen Lee, MD  
Regional Medical Director*

Join the largest, most dynamic mental health department in the nation. We are creating the future of mental health services, and we are seeking physicians who are ready to join our team and push the boundaries of traditional community practice.

To learn more about employment as a psychiatrist with the Los Angeles County Department of Mental Health, including salary and benefits, please visit:

[www.PsychiatristJobs.LA](http://www.PsychiatristJobs.LA)

**Psychiatric Services** (ISSN 1075-2730; online version, 1557-9700) is published monthly by the American Psychiatric Association, editorial and executive office, 1000 Wilson Blvd., Suite 1825, Arlington, VA 22209-3901. Copyright © 2015 by the American Psychiatric Association. Printed in U.S.A. Periodicals postage paid at Arlington, VA, and at additional mailing offices. POSTMASTER: Send address changes to **Psychiatric Services, 1000 Wilson Blvd., Suite 1825, Arlington, VA 22209-3901.**

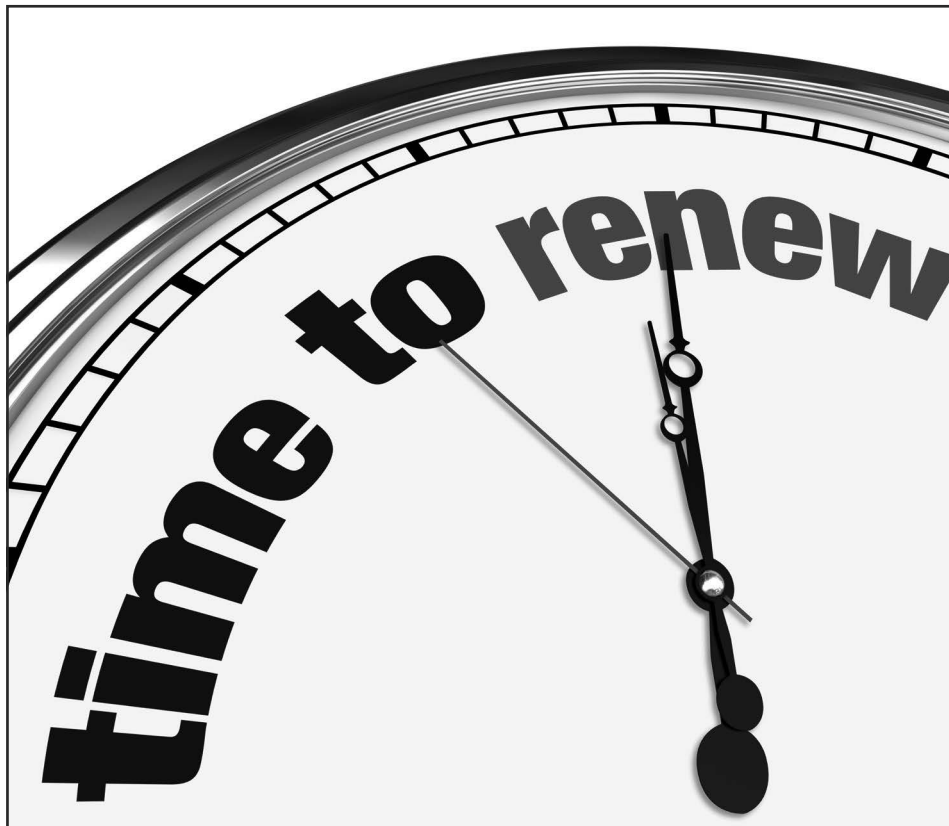

**YOUR 2015 APA  
MEMBERSHIP EXPIRES  
DECEMBER 31, 2015.**

Don't wait till the last minute.

Renew your membership for 2016 TODAY at [psychiatry.org/paydues](http://psychiatry.org/paydues)

Or call APA Member Services:

703-907-7300 or  
1-888-357-7924

and ask us about Scheduled Payment Plan to pay your dues in installments.

AMERICAN  
PSYCHIATRIC  
ASSOCIATION

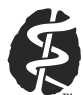

# DSM-5® Classification

American Psychiatric Association

This handy **DSM-5® Classification** provides a ready reference to the DSM-5® classification of disorders, as well as the DSM-5® listings of ICD-9-CM and ICD-10-CM codes for all DSM-5® diagnoses. To be used in tandem with **DSM-5®** or the *Desk Reference to the Diagnostic Criteria From DSM-5®*.

2016 • 183 pages • ISBN 978-0-89042-566-4 • Spiralbound  
\$29.95 • Item #2566

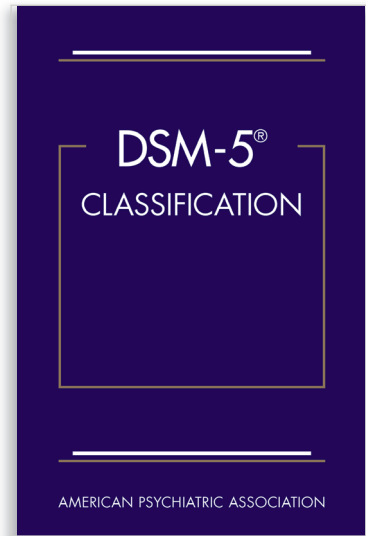

## DSM-5 Classification

Before each disorder name, ICD-9-CM codes are provided, followed by ICD-10-CM codes in parentheses. Blank lines indicate that either the ICD-9-CM or the ICD-10-CM code is not applicable. For some disorders, the code can be indicated only according to the subtype or specifier.

ICD-9-CM codes are to be used for coding purposes in the United States through September 30, 2015. ICD-10-CM codes are to be used starting October 1, 2015. For DSM-5 coding and other updates, see the DSM-5® Update on [www.PsychiatryOnline.org](http://www.PsychiatryOnline.org).

**Note for all mental disorders due to another medical condition:** Indicate the name of the other medical condition in the name of the mental disorder due to [the medical condition]. The code and name for the other medical condition should be listed first immediately before the mental disorder due to the medical condition.

### Neurodevelopmental Disorders

#### Intellectual Disabilities

|             |                                     |
|-------------|-------------------------------------|
| — (—)       | Intellectual Disability (Disorder)  |
|             | <i>Specify current severity:</i>    |
| 317 (F70)   | Mild                                |
| 318.0 (F71) | Moderate                            |
| 318.1 (F72) | Severe                              |
| 318.2 (F73) | Profound                            |
| 315.8 (F88) | Global Developmental Delay          |
| 319 (F79)   | Unspecified Intellectual Disability |

1

## Alphabetical Listing of DSM-5 Diagnoses and Codes (ICD-9-CM and ICD-10-CM)

ICD-9-CM codes are to be used for coding purposes in the United States through September 30, 2015. ICD-10-CM codes are to be used starting October 1, 2015.

For DSM-5 coding and other updates, see the DSM-5® Update on [www.PsychiatryOnline.org](http://www.PsychiatryOnline.org).

| ICD-9-CM | ICD-10-CM | Disorder, condition, or problem |
|----------|-----------|---------------------------------|
| V62.3    | Z55.9     | Academic or educational problem |
| V62.4    | Z60.3     | Acculturation difficulty        |
| 308.3    | F43.0     | Acute stress disorder           |
|          |           | Adjustment disorders            |
|          |           | With anxiety                    |
| 309.24   | F43.22    | With depressed mood             |
| 309.0    | F43.21    |                                 |

## Numerical Listing of DSM-5 Diagnoses and Codes (ICD-9-CM)

ICD-9-CM codes are to be used for coding purposes in the United States through September 30, 2015. ICD-10-CM codes are to be used starting October 1, 2015.

For DSM-5 coding and other updates, see the DSM-5® Update on [www.PsychiatryOnline.org](http://www.PsychiatryOnline.org).

| ICD-9-CM | Disorder, condition, or problem                                                                |
|----------|------------------------------------------------------------------------------------------------|
| 278.00   | Overweight or obesity                                                                          |
| 290.40   | Major neurocognitive disorder possibly due to vascular disease, With behavioral disturbance    |
| 290.40   | Major neurocognitive disorder possibly due to vascular disease, Without behavioral disturbance |
| 290.40   | Major neurocognitive disorder probably due to vascular disease, With behavioral disturbance    |
| 290.40   | Major neurocognitive disorder probably due to vascular disease, Without behavioral disturbance |

## Numerical Listing of DSM-5 Diagnoses and Codes (ICD-10-CM)

ICD-10-CM codes are to be used for coding purposes in the United States starting October 1, 2015.

For DSM-5 coding and other updates, see the DSM-5® Update on [www.PsychiatryOnline.org](http://www.PsychiatryOnline.org).

| ICD-10-CM | Disorder, condition, or problem                                                                |
|-----------|------------------------------------------------------------------------------------------------|
| E66.9     | Overweight or obesity                                                                          |
| F01.50    | Major neurocognitive disorder possibly due to vascular disease, Without behavioral disturbance |
| F01.50    | Major neurocognitive disorder probably due to vascular disease, Without behavioral disturbance |
| F01.51    | Major neurocognitive disorder possibly due to vascular disease, With behavioral disturbance    |
| F01.51    | Major neurocognitive disorder probably due to vascular disease, Without behavioral disturbance |

# DSM-5 SELECTIONS

## DSM-5® Selections

American Psychiatric Association

These selections provide a comprehensive overview of the process of diagnosing disorders while serving as a reference guide to assist in the diagnosis of individual patients. The disorder-specific resource is an invaluable addition to the DSM-5® collection and an important contribution to the mental health profession.

This book contains the critical disorder-specific content from these four titles:

- Diagnostic and Statistical Manual of Mental Disorders, Fifth Edition (DSM-5®)
- DSM-5® Clinical Cases
- DSM-5® Self-Exam Questions
- DSM-5® Guidebook

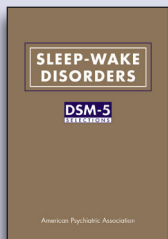

*Just Published!*

### Sleep-Wake Disorders

DSM-5® Selections

2015 • 160 pages  
ISBN 978-1-61537-009-2  
Paperback • \$39.00  
Item #37009

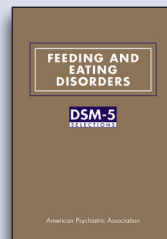

*Just Published!*

### Feeding and Eating Disorders

DSM-5® Selections

2016 • 86 pages  
ISBN 978-1-61537-012-2  
Paperback • \$39.00  
Item #37012

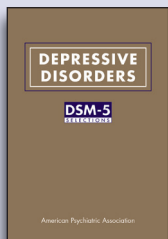

*Just Published!*

### Depressive Disorders

DSM-5® Selections

2015 • 136 pages  
ISBN 978-1-61537-010-8  
Paperback • \$39.00  
Item #37010

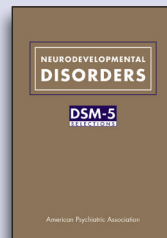

*Just Published!*

### Neurodevelopmental Disorders

DSM-5® Selections

2016 • 196 pages  
ISBN 978-1-61537-013-9  
Paperback • \$39.00  
Item #37013

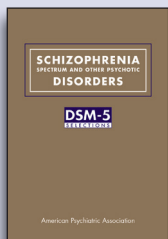

*Just Published!*

### Schizophrenia Spectrum and Other Psychotic Disorders

DSM-5® Selections

2015 • 133 pages  
ISBN 978-1-61537-011-5  
Paperback • \$39.00  
Item #37011

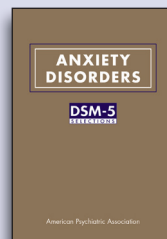

*Just Published!*

### Anxiety Disorders

DSM-5® Selections

2016 • 128 pages  
ISBN 978-1-61537-014-6  
Paperback • \$39.00  
Item #37014

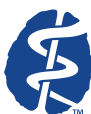

Source: https://psychiatryonline.org/doi/suppl/10.1176/ps.2015.66.issue-12/suppl_file/back.pdf
