# Psychiatric Services

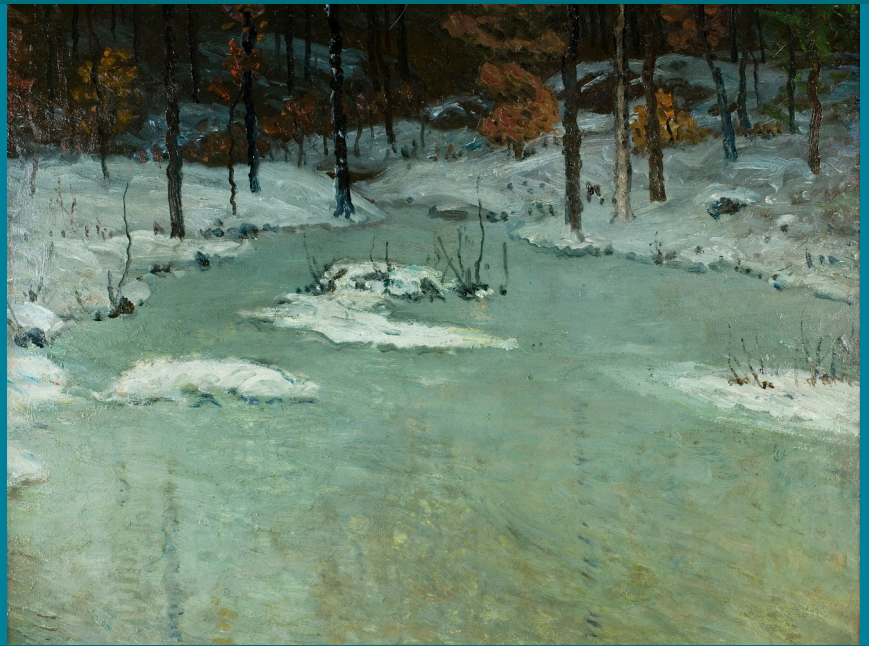

Financial health and mental health of service users: making the connections  
Estimating lost revenues for states opting out of the ACA Medicaid expansion  
Fidelity to the Housing First model and variation in health service use  
Comparing the WHODAS 2.0 and the GAF to assess functioning among veterans
